# Supplementary material
Source: PubMed Central journal article supplement (PMC4678788)
Supplement: mmc1.pdf [file mmc1.pdf]

The American Journal of Human Genetics

Supplemental Data

***De Novo GMNN* Mutations Cause  
Autosomal-Dominant Primordial Dwarfism  
Associated with Meier-Gorlin Syndrome**

Lindsay C. Burrage, Wu-Lin Charng, Mohammad K. Eldomery, Jason R. Willer, Erica E. Davis, Dorien Lugtenberg, Wenmiao Zhu, Magalie S. Leduc, Zeynep C. Akdemir, Mahshid Azamian, Gladys Zapata, Patricia P. Hernandez, Jeroen Schoots, Sonja A. de Munnik, Ronald Roepman, Jillian N. Pearing, Shalini Jhangiani, Nicholas Katsanis, Lisenka E.L.M. Vissers, Han G. Brunner, Arthur L. Beudet, Jill A. Rosenfeld, Donna M. Muzny, Richard A. Gibbs, Christine M. Eng, Fan Xia, Seema R. Lalani, James R. Lupski, Ernie M.H.F. Bongers, and Yaping Yang

**Table S1. WES Sequencing Data of Subjects 1 and 2**

| Subject | Illumina Platform | Unique Aligned (Mb) <sup>a</sup> | Total Pass Filter (Mb) <sup>b</sup> | Avg % Align (PF) Read 1 <sup>c</sup> | Avg % Align (PF) Read 2 <sup>d</sup> | Avg % Error Rate Read 1 <sup>e</sup> | Avg % Error Rate Read 2 <sup>f</sup> | Unique-ness % <sup>g</sup> | Duplicate % <sup>h</sup> | Total Reads Aligned % <sup>i</sup> | Avg Coverage <sup>j</sup> | Reads Hit Target/Buffer <sup>k</sup> | Bases 20+ Coverage <sup>l</sup> |
|---------|-------------------|----------------------------------|-------------------------------------|--------------------------------------|--------------------------------------|--------------------------------------|--------------------------------------|----------------------------|--------------------------|------------------------------------|---------------------------|--------------------------------------|---------------------------------|
| 1       | HiSeq2000         | 17,066                           | 18,622                              | 98%                                  | 97%                                  | 0.5%                                 | 1.0%                                 | 94%                        | 9%                       | 98%                                | 226                       | 75%                                  | 97%                             |
| 2       | HiSeq2000         | 9,369                            | 10,366                              | 94%                                  | 94%                                  | 0.9%                                 | 1.4%                                 | 96%                        | 7%                       | 94%                                | 116                       | 80%                                  | 92%                             |

<sup>a</sup>Unique Aligned (Mbp): the total number of base-pairs in reads that align best to a single location in the reference genome

<sup>b</sup>Total Pass Filter (Mbp): the total number of base-pairs in reads that pass the Illumina quality filters

<sup>c</sup>Avg % Align (PF) Read 1: the average percentage of pass filter base-pairs in Read 1 that align best to a single location in the reference genome

<sup>d</sup>Avg % Align (PF) Read 2: the average percentage of pass filter base-pairs in Read 2 that align best to a single location in the reference genome

<sup>e</sup>Avg % Error rate Read 1: the calculated error rate of bases on Read 1, as determined by aligning to reference genome

<sup>f</sup>Avg % Error rate Read 2: the calculated error rate of bases on Read 2, as determined by aligning to reference genome

<sup>g</sup>percentage of unique reads

<sup>h</sup>duplicate %: fraction of reads that are identified as duplicate reads – reads whose alignment location is identical to other reads from the same library

<sup>i</sup>Total Reads Aligned: the number of reads that align to the reference genome

<sup>j</sup>Average Coverage: the total number of uniquely aligned bases to the reference genome divided by the size of the reference genome

<sup>k</sup>Reads hit target/buffer: the number of reads whose alignments overlap either a region targeted by the capture reagent, or the 100bp buffer (or both)

<sup>l</sup>Bases 20+ Coverage: the fraction of bases targeted by the capture reagent that are covered by 20 or 40 times or more uniquely aligned reads.

**Table S2. Primer information**

| Gene        | Target  | Forward/<br>Reverse | Chr. | Start Position | End Position | Primer sequence (5' to 3')     | Purpose                                        |
|-------------|---------|---------------------|------|----------------|--------------|--------------------------------|------------------------------------------------|
| <i>GMNN</i> | Exon 01 | F                   | 6    | 24775062       | 24775082     | cggctcctaagctactcgctac         | genomic sequencing of patient 3                |
| <i>GMNN</i> | Exon 01 | R                   | 6    | 24775481       | 24775498     | accgttcaacaacccttc             | genomic sequencing of patient 3                |
| <i>GMNN</i> | Exon 02 | F                   | 6    | 24777312       | 24777331     | attgacagggtgagttgg             | genomic sequencing of patient 2 and 3          |
| <i>GMNN</i> | Exon 02 | R                   | 6    | 24777559       | 24777578     | cttttagccccatgctttct           | genomic sequencing of patient 2 and 3          |
| <i>GMNN</i> | Exon 03 | F                   | 6    | 24780770       | 24780789     | tggtcctttccaccctaa             | genomic sequencing of patient 3                |
| <i>GMNN</i> | Exon 03 | R                   | 6    | 24781138       | 24781157     | tgcaccgcagcaacttcta            | genomic sequencing of patient 3                |
| <i>GMNN</i> | Exon 04 | F                   | 6    | 24781584       | 24781608     | gatccagagatgtgaaaaagttaga      | genomic sequencing of patient 3                |
| <i>GMNN</i> | Exon 04 | R                   | 6    | 24782022       | 24782041     | actgggctcctttcctaa             | genomic sequencing of patient 3                |
| <i>GMNN</i> | Exon 05 | F                   | 6    | 24784224       | 24784244     | tgggggtactaagattggaaa          | genomic sequencing of patient 3                |
| <i>GMNN</i> | Exon 05 | R                   | 6    | 24784469       | 24784489     | aaagctagcccatattgctct          | genomic sequencing of patient 3                |
| <i>GMNN</i> | Exon 06 | F                   | 6    | 24784577       | 24784596     | gctgcatgtcctccatgta            | genomic sequencing of patient 3                |
| <i>GMNN</i> | Exon 06 | R                   | 6    | 24784835       | 24784860     | caaagtgatcacactacactaccta      | genomic sequencing of patient 3                |
| <i>GMNN</i> | Exon 07 | F                   | 6    | 24785781       | 24785805     | tgctatacgggtcagctatatcagt      | genomic sequencing of patient 3                |
| <i>GMNN</i> | Exon 07 | R                   | 6    | 24786058       | 24786078     | tggaggtaaacttcggcagta          | genomic sequencing of patient 3                |
| <i>GMNN</i> | Exon 02 | F                   | 6    | 24777385       | 24777415     | tgtaagtattttaaacttagactccacctc | genomic sequencing of patient 1                |
| <i>GMNN</i> | Exon 02 | R                   | 6    | 24777557       | 24777579     | acttttagccccatgctttctac        | genomic sequencing of patient 1                |
| <i>GMNN</i> | cDNA    | F                   | 6    | 24777461       | 24777486     | tcaccatctacataatgaatcccagt     | cDNA sequencing of patient 1                   |
| <i>GMNN</i> | cDNA    | R                   | 6    | 24781754       | 24781773     | cccagggctggaagttgtag           | cDNA sequencing of patient 1                   |
| <i>GMNN</i> | cDNA    | F                   | 6    | 24777446       | 24777467     | ctggtcttctgtgcttcacat          | cDNA sequencing of single clones for patient 1 |
| <i>GMNN</i> | cDNA    | R                   | 6    | 24786056       | 24786078     | tggaggtaaacttcggcagtaaa        | cDNA sequencing of single clones for patient 1 |
| <i>GMNN</i> | cDNA    | F                   | 6    | 24777480       | 24777501     | tcccagatgaagcagaacaaa          | cDNA sequencing of patient 2                   |
| <i>GMNN</i> | cDNA    | R                   | 6    | 24785869       | 24785888     | tccagaggttcaccattcag           | cDNA sequencing of patient 2                   |

### Subject 1

*GMNN* c.16A>T (p.Lys6\*)

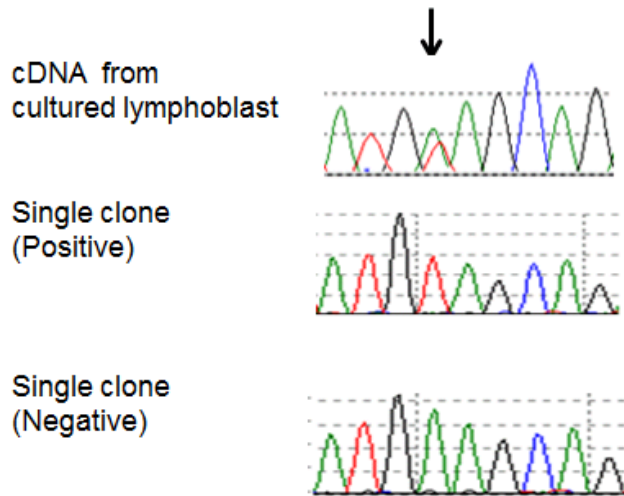

### Subject 2

*GMNN* c.35\_38delTCAA (p.Ile12Lysfs\*4)

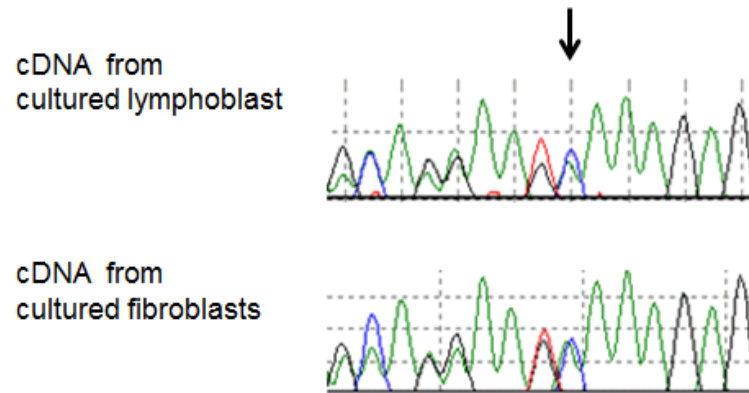

**Figure S1. mRNA studies of subjects 1 and 2.**

Sequence traces of RT-PCR products from cell lines of subjects 1 and 2 show the presence of both mutant and wild type sequence at about 1:1 ratio. TOPO TA-cloning of the RT-PCR product from subject 1 and Sanger sequencing of individual clones (8 total) indicates that the mutant allele is present in 50% (4 out of 8) of *GMNN* transcripts. The data suggest that the mutant alleles are not subject to NMD.

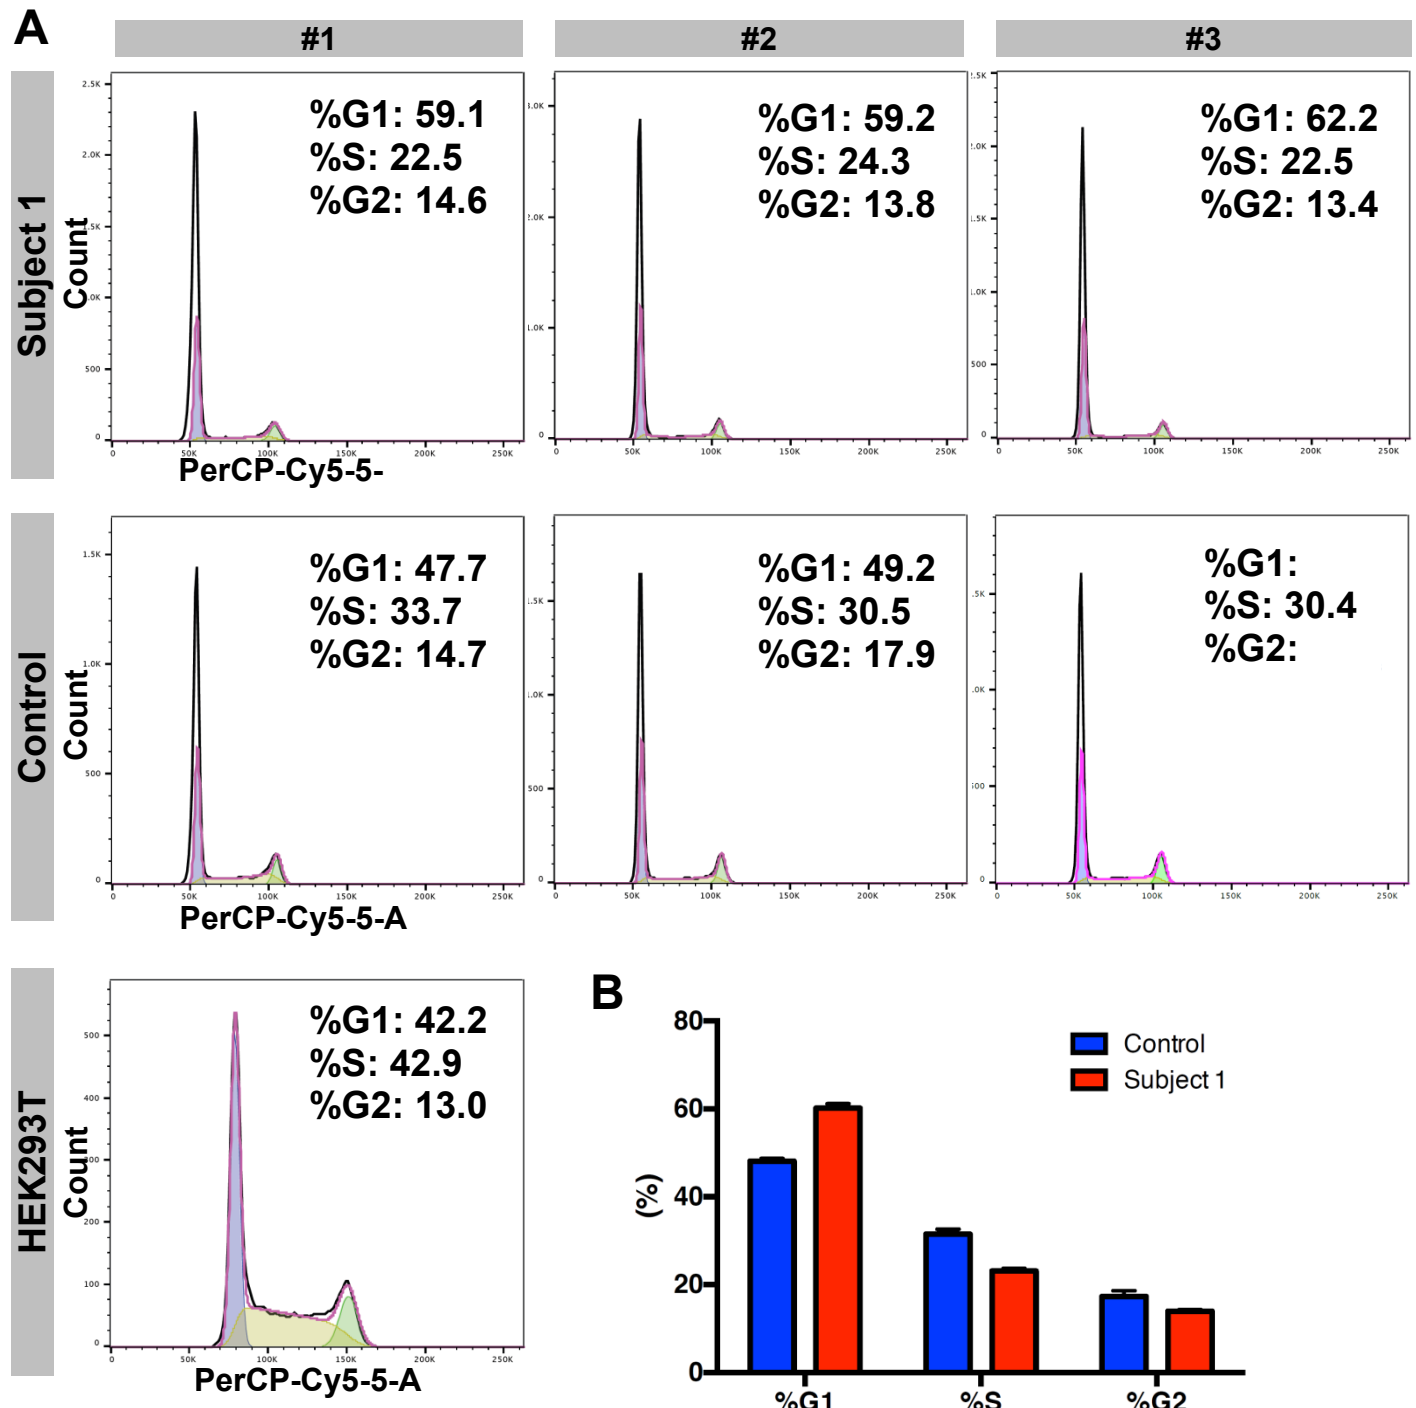

**Figure S3. Flow cytometric analysis of cell cycle phases.**

(A) Flow cytometric analyses of lymphoblast of subject 1 and the father (as a control) stained by propidium iodide (PI) (control). X axis presents the cell content as determined by intensity of Propidium Iodide (PI) staining corresponding to 2n (G1 phase), 4n (G2 phase), and areas in between (S phase). Y axis presents cell number. Non-synchronized HEK293T cell was used as a control for cell cycle PI staining. The data were obtained from three independent experiments (labeled as #1, #2, #3 in the figure). The statistical analyses were performed using Student's *t*-test.

(B) Histogram of cell distributions in G1 (60.2%±1.8% vs. 48.1%±0.9%), S (23.1%±1.0% vs. 31.5%±1.9%), and G2 (13.9%± 0.6% vs. 17.3%± 2.4%) phases in lymphoblast of subject 1 and the father (as a control) respectively. Values for the bars represent means for the three independent experiments ± 1 standard deviation (1 SD).
